# Supplementary material for: Prevalence and Prognostic Value of Malnutrition Among Elderly Cancer Patients Using Three Scoring Systems
Source: PubMed Central journal article supplement (PMC8544751; doi:10.3389/fnut.2021.738550), 2021-10-11

Supplementary table 1. Procedures for the evaluation of each nutritional index.

| Nutritional Indices                           | Risk of Malnutrition |              |              |          |
|-----------------------------------------------|----------------------|--------------|--------------|----------|
|                                               | Absent               | Mild         | Moderate     | Severe   |
| CONUT                                         | 0-1                  | 2-4          | 5-8          | 9-12     |
| Albumin, g/ dL(score)                         | ≥3.5(0)              | 3.0-3.4(2)   | 2.5-2.9(4)   | <2.5(6)  |
| Total cholesterol, mmol/L (score )            | ≥180(0)              | 140-199(1)   | 100-139(2)   | <100(3)  |
| Lymphocyte count, *10 <sup>9</sup> /L(score ) | ≥1.60(0)             | 1.20-1.59(1) | 0.80-1.19(2) | <0.80(3) |
| NRI                                           | ≥100                 | 97.50-99.99  | 83.50-97.49  | <83.50   |
| PNI                                           | >38                  | -            | 35-38        | <35      |

CONUT: Controlling Nutritional Status score, PNI: prognostic nutritional index, NRI: nutritional risk index

Supplementary table 2. Baseline Characteristics of the Study Population stratified by CONUT.

| COUNT                          | Overall<br>n=1494 | Absent<br>n=672 | Mild malnutrition<br>n=602 | Moderate malnutrition<br>n=193 | Severe malnutrition<br>n=27 | P-value |
|--------------------------------|-------------------|-----------------|----------------------------|--------------------------------|-----------------------------|---------|
| Age, years                     | 70.76(5.16)       | 70.07(4.84)     | 71.04(5.21)                | 72.13(5.43)                    | 71.67(7.18)                 | 0.001   |
| Gender, male                   | 951(63.65%)       | 397(59.08%)     | 397(65.95%)                | 137(70.98%)                    | 20(74.07%)                  | 0.004   |
| BMI, kg/m <sup>2</sup>         | 22.58(3.55)       | 23.15(3.42)     | 22.47(3.63)                | 21.33(3.32)                    | 19.71(2.97)                 | 0.001   |
| Smoking, yes                   | 696(46.59%)       | 304(45.24%)     | 283(47.01%)                | 91(47.15%)                     | 18(66.67%)                  | 0.177   |
| Alcohol, yes                   | 289(19.34%)       | 113(16.82%)     | 132(21.93%)                | 39(20.21%)                     | 5(18.52%)                   | 0.143   |
| Comorbidities                  |                   |                 |                            |                                |                             |         |
| Absent                         | 1081(72.36%)      | 499(74.26%)     | 428(71.10%)                | 134(69.43%)                    | 20(74.07%)                  |         |
| Hypertension                   | 337(22.56%)       | 155(23.07%)     | 130(21.59%)                | 48(24.87%)                     | 4(14.81%)                   |         |
| Others                         | 76(5.09%)         | 18(2.68%)       | 44(7.31%)                  | 11(5.70%)                      | 3(11.11%)                   |         |
| Tumor location                 |                   |                 |                            |                                |                             | 0.005   |
| Lung                           | 458(30.66%)       | 198(29.46%)     | 198(32.89%)                | 53(27.46%)                     | 9(33.33%)                   |         |
| Digestive                      | 759(50.80%)       | 324(48.21%)     | 303(50.33%)                | 118(61.14%)                    | 14(51.85%)                  |         |
| Other                          | 277(18.54%)       | 150(22.32%)     | 101(16.78%)                | 22(11.40%)                     | 4(14.81%)                   |         |
| Tumor stage:                   |                   |                 |                            |                                |                             | <0.001  |
| I                              | 147(9.84%)        | 84(12.50%)      | 50(8.31%)                  | 13(6.74%)                      | 0(0.00%)                    |         |
| II                             | 336(22.49%)       | 167(24.85%)     | 122(20.27%)                | 40(20.73%)                     | 7(25.93%)                   |         |
| III                            | 373(24.97%)       | 176(26.19%)     | 149(24.75%)                | 43(22.28%)                     | 5(18.52%)                   |         |
| IV                             | 638(42.70%)       | 245(36.46%)     | 281(46.68%)                | 97(50.26%)                     | 15(55.56%)                  |         |
| Chemotherapy, yes              | 939(62.85%)       | 420(62.50%)     | 399(66.28%)                | 105(54.40%)                    | 15(55.56%)                  | 0.023   |
| Immunotherapy, yes             | 109(7.30%)        | 47(6.99%)       | 49(8.14%)                  | 13(6.74%)                      | 0(0.00%)                    | 0.483   |
| Surgery, yes                   | 357(23.90%)       | 171(25.45%)     | 122(20.27%)                | 57(29.53%)                     | 7(25.93%)                   | 0.034   |
| ECOG                           | 1.09(0.80)        | 0.95(0.66)      | 1.13(0.83)                 | 1.35(0.88)                     | 1.78(1.28)                  | <0.001  |
| Albumin, g/dl                  | 3.80(0.53)        | 4.08(0.33)      | 3.78(0.42)                 | 3.07(0.48)                     | 2.54(0.34)                  | <0.001  |
| Cholesterol, mg/dl             | 182.95(60.94)     | 204.82(50.00)   | 175.02(67.04)              | 142.14(40.34)                  | 106.99(25.03)               | <0.001  |
| Lymphocyte, 10 <sup>9</sup> /L | 1.67(1.37)        | 2.08(1.28)      | 1.42(1.53)                 | 1.12(0.50)                     | 0.85(0.40)                  | <0.001  |
| CONUT, as continuous           | 2.30(2.21)        | 0.49(0.50)      | 2.77(0.79)                 | 6.10(1.02)                     | 9.56(0.85)                  | <0.001  |
| Category                       |                   |                 |                            |                                |                             |         |
| Absent                         | 672(44.98%)       | 672(100.00%)    | 0(0.00%)                   | 0(0.00%)                       | 0(0.00%)                    |         |
| Mild                           | 602(40.29%)       | 0(0.00%)        | 602(100.00%)               | 0(0.00%)                       | 0(0.00%)                    |         |
| Moderate                       | 193(12.92%)       | 0(0.00%)        | 0(0.00%)                   | 193(100.00%)                   | 0(0.00%)                    |         |
| Severe                         | 27(1.81%)         | 0(0.00%)        | 0(0.00%)                   | 0(0.00%)                       | 27(100.00%)                 |         |
| PNI, as continuous             | 46.05(9.90)       | 51.16(7.10)     | 44.97(8.12)                | 34.26(9.19)                    | 27.26(8.75)                 | <0.001  |
| Category                       |                   |                 |                            |                                |                             |         |
| Absent                         | 1320(88.35%)      | 672(100.00%)    | 579(96.18%)                | 69(35.75%)                     | 0(0.00%)                    |         |
| Moderate                       | 77(5.15%)         | 0(0.00%)        | 22(3.65%)                  | 55(28.50%)                     | 0(0.00%)                    |         |
| Severe                         | 97(6.49%)         | 0(0.00%)        | 1(0.17%)                   | 69(35.75%)                     | 27(100.00%)                 |         |
| NRI, as continuous             | 96.96(10.32)      | 101.73(5.34)    | 97.10(6.85)                | 83.02(14.57)                   | 74.54(13.20)                | <0.001  |
| Category                       |                   |                 |                            |                                |                             |         |
| Absent                         | 617(41.30%)       | 409(60.86%)     | 202(33.55%)                | 6(3.11%)                       | 0(0.00%)                    |         |
| Mild                           | 174(11.65%)       | 101(15.03%)     | 70(11.63%)                 | 3(1.55%)                       | 0(0.00%)                    |         |
| Moderate                       | 607(40.63%)       | 162(24.11%)     | 323(53.65%)                | 117(60.62%)                    | 5(18.52%)                   |         |
| Severe                         | 96(6.43%)         | 0(0.00%)        | 7(1.16%)                   | 67(34.72%)                     | 22(81.48%)                  |         |
| PG-SGA, as continuous          | 6.26(4.48)        | 5.10(3.70)      | 6.67(4.58)                 | 8.41(5.03)                     | 10.56(5.77)                 | <0.001  |
| Category                       |                   |                 |                            |                                |                             |         |
| Absent                         | 52(3.48%)         | 38(5.65%)       | 11(1.83%)                  | 3(1.55%)                       | 0(0.00%)                    |         |
| Mild                           | 503(33.67%)       | 278(41.37%)     | 184(30.56%)                | 40(20.73%)                     | 1(3.70%)                    |         |

|              |             |             |             |             |             |        |
|--------------|-------------|-------------|-------------|-------------|-------------|--------|
| Moderate     | 549(36.75%) | 238(35.42%) | 235(39.04%) | 66(34.20%)  | 10(37.04%)  |        |
| Severe       | 390(26.10%) | 118(17.56%) | 172(28.57%) | 84(43.52%)  | 16(59.26%)  |        |
| HGS, kg      | 22.38(8.93) | 23.09(9.13) | 22.33(8.72) | 20.76(8.58) | 17.79(8.61) | <0.001 |
| EORTCQLQ-C30 | 39.21(4.79) | 39.13(4.88) | 39.44(4.57) | 38.96(4.99) | 38.03(5.72) | 0.294  |
| PN, yes      | 188(12.58%) | 71(10.57%)  | 72(11.96%)  | 40(20.73%)  | 5(18.52%)   | 0.002  |
| EN, yes      | 146(9.77%)  | 58(8.63%)   | 60(9.97%)   | 26(13.47%)  | 2(7.41%)    | 0.256  |

Values are mean (standard deviation) or n (%).

BMI: body mass index, ECOG: Eastern Cooperative Oncology Group, CONUT: Controlling Nutritional Status score, PNI: prognostic nutritional index, NRI: nutritional risk index, PG-SGA: patient-generated subjective global assessment, HGS: hand grip strength, EORTC QLQ-C30: European Organization for Research and Treatment of Cancer Quality of Life Questionnaire, PN: parenteral nutrition, EN: enteral nutrition.

Supplementary table 3. Baseline Characteristics of the Study Population stratified by NRI.

| NRI                            | Overall       | Absent        | Mild malnutrition | Moderate malnutrition | Severe malnutrition | P-value |
|--------------------------------|---------------|---------------|-------------------|-----------------------|---------------------|---------|
|                                | N=1494        | N=617         | N=174             | N=607                 | N=96                |         |
| Age, years                     | 70.76(5.16)   | 70.12(4.86)   | 70.40(4.84)       | 71.31(5.35)           | 71.98(5.82)         | <0.001  |
| Gender, male                   | 951(63.65%)   | 361(58.51%)   | 115(66.09%)       | 405(66.72%)           | 70(72.92%)          | 0.004   |
| BMI, kg/m <sup>2</sup>         | 22.58(3.55)   | 23.35(3.51)   | 23.01(3.36)       | 21.93(3.46)           | 20.89(3.46)         | <0.001  |
| Smoking, yes                   | 696(46.59%)   | 264(42.79%)   | 86(49.43%)        | 294(48.43%)           | 52(54.17%)          | 0.066   |
| Alcohol, yes                   | 289(19.34%)   | 102(16.53%)   | 39(22.41%)        | 128(21.09%)           | 20(20.83%)          | 0.139   |
| Comorbidities                  |               |               |                   |                       |                     |         |
| Absent                         | 1081(72.36%)  | 448(72.61%)   | 126(72.41%)       | 435(71.66%)           | 72(75.00%)          |         |
| Hypertension                   | 337(22.56%)   | 140(22.69%)   | 42(24.14%)        | 138(22.73%)           | 17(17.71%)          |         |
| Others                         | 76(5.09%)     | 29(4.70%)     | 6(3.45%)          | 34(5.60%)             | 7(7.29%)            |         |
| Tumor location                 |               |               |                   |                       |                     | <0.001  |
| Lung                           | 458(30.66%)   | 193(31.28%)   | 48(27.59%)        | 187(30.81%)           | 30(31.25%)          |         |
| Digestive                      | 759(50.80%)   | 278(45.06%)   | 86(49.43%)        | 343(56.51%)           | 52(54.17%)          |         |
| Other                          | 277(18.54%)   | 146(23.66%)   | 40(22.99%)        | 77(12.69%)            | 14(14.58%)          |         |
| Tumor stage:                   |               |               |                   |                       |                     | <0.001  |
| I                              | 147(9.84%)    | 82(13.29%)    | 18(10.34%)        | 42(6.92%)             | 5(5.21%)            |         |
| II                             | 336(22.49%)   | 157(25.45%)   | 32(18.39%)        | 128(21.09%)           | 19(19.79%)          |         |
| III                            | 373(24.97%)   | 154(24.96%)   | 52(29.89%)        | 147(24.22%)           | 20(20.83%)          |         |
| IV                             | 638(42.70%)   | 224(36.30%)   | 72(41.38%)        | 290(47.78%)           | 52(54.17%)          |         |
| Chemotherapy, yes              | 939(62.85%)   | 385(62.40%)   | 124(71.26%)       | 373(61.45%)           | 57(59.38%)          | 0.096   |
| Immunotherapy, yes             | 109(7.30%)    | 51(8.27%)     | 13(7.47%)         | 41(6.75%)             | 4(4.17%)            | 0.472   |
| Surgery, yes                   | 357(23.90%)   | 144(23.34%)   | 33(18.97%)        | 150(24.71%)           | 30(31.25%)          | 0.138   |
| ECOG                           | 1.09(0.80)    | 0.98(0.71)    | 0.93(0.70)        | 1.18(0.82)            | 1.48(1.05)          | <0.001  |
| Albumin, g/dl                  | 3.80(0.53)    | 4.26(0.26)    | 3.88(0.12)        | 3.50(0.25)            | 2.60(0.34)          | <0.001  |
| Cholesterol, mg/dl             | 182.95(60.94) | 194.51(53.55) | 187.73(60.15)     | 175.50(67.07)         | 147.07(43.74)       | <0.001  |
| Lymphocyte, 10 <sup>9</sup> /L | 1.67(1.37)    | 1.76(1.04)    | 1.74(1.16)        | 1.62(1.75)            | 1.29(0.57)          | 0.010   |
| CONUT, as continuous           | 2.30(2.21)    | 1.22(1.23)    | 1.43(1.27)        | 2.88(2.00)            | 7.19(1.84)          | <0.001  |
| Category                       |               |               |                   |                       |                     |         |
| Absent                         | 672(44.98%)   | 409(66.29%)   | 101(58.05%)       | 162(26.69%)           | 0(0.00%)            |         |
| Mild                           | 602(40.29%)   | 202(32.74%)   | 70(40.23%)        | 323(53.21%)           | 7(7.29%)            |         |
| Moderate                       | 193(12.92%)   | 6(0.97%)      | 3(1.72%)          | 117(19.28%)           | 67(69.79%)          |         |
| Severe                         | 27(1.81%)     | 0(0.00%)      | 0(0.00%)          | 5(0.82%)              | 22(22.92%)          |         |
| PNI, as continuous             | 46.05(9.90)   | 51.44(5.84)   | 47.49(5.88)       | 43.07(9.18)           | 27.70(11.33)        | <0.001  |
| Category                       |               |               |                   |                       |                     |         |
| Absent                         | 1320(88.35%)  | 617(100.00%)  | 174(100.00%)      | 517(85.17%)           | 12(12.50%)          |         |
| Moderate                       | 77(5.15%)     | 0(0.00%)      | 0(0.00%)          | 64(10.54%)            | 13(13.54%)          |         |
| Severe                         | 97(6.49%)     | 0(0.00%)      | 0(0.00%)          | 26(4.28%)             | 71(73.96%)          |         |
| NRI, as continuous             | 96.96(10.32)  | 104.98(3.83)  | 98.78(0.70)       | 92.36(3.77)           | 71.20(16.03)        | <0.001  |
| Category                       |               |               |                   |                       |                     |         |
| Absent                         | 617(41.30%)   | 617(100.00%)  | 0(0.00%)          | 0(0.00%)              | 0(0.00%)            |         |
| Mild                           | 174(11.65%)   | 0(0.00%)      | 174(100.00%)      | 0(0.00%)              | 0(0.00%)            |         |
| Moderate                       | 607(40.63%)   | 0(0.00%)      | 0(0.00%)          | 607(100.00%)          | 0(0.00%)            |         |
| Severe                         | 96(6.43%)     | 0(0.00%)      | 0(0.00%)          | 0(0.00%)              | 96(100.00%)         |         |
| PG-SGA, as continuous          | 6.26(4.48)    | 4.67(3.32)    | 5.47(3.78)        | 7.53(4.79)            | 9.90(5.43)          | <0.001  |
| Category                       |               |               |                   |                       |                     |         |
| Absent                         | 52(3.48%)     | 29(4.70%)     | 9(5.17%)          | 12(1.98%)             | 2(2.08%)            |         |
| Mild                           | 503(33.67%)   | 282(45.71%)   | 63(36.21%)        | 145(23.89%)           | 13(13.54%)          |         |

|              |             |             |             |             |             |       |
|--------------|-------------|-------------|-------------|-------------|-------------|-------|
| Moderate     | 549(36.75%) | 229(37.12%) | 65(37.36%)  | 227(37.40%) | 28(29.17%)  |       |
| Severe       | 390(26.10%) | 77(12.48%)  | 37(21.26%)  | 223(36.74%) | 53(55.21%)  |       |
| HGS,kg       | 22.38(8.93) | 23.25(9.11) | 22.93(9.20) | 21.74(8.53) | 19.97(9.16) | 0.001 |
| EORTCQLQ-C30 | 39.21(4.79) | 39.34(4.88) | 39.28(4.10) | 39.10(4.82) | 39.01(5.26) | 0.796 |
| PN,yes       | 188(12.58%) | 78(12.64%)  | 21(12.07%)  | 69(11.37%)  | 20(20.83%)  | 0.079 |
| EN,yes       | 146(9.77%)  | 66(10.70%)  | 16(9.20%)   | 47(7.74%)   | 17(17.71%)  | 0.016 |

Values are mean (standard deviation) or n (%).

BMI: body mass index, ECOG: Eastern Cooperative Oncology Group, CONUT: Controlling Nutritional Status score, PNI: prognostic nutritional index, NRI: nutritional risk index, PG-SGA: patient-generated subjective global assessment, HGS: hand grip strength, EORTC QLQ-C30: European Organization for Research and Treatment of Cancer Quality of Life Questionnaire, PN: parenteral nutrition, EN: enteral nutrition.

Supplementary table 4. Baseline Characteristics of the Study Population stratified by PNI.

| PNI                            | Overall<br>N=1494 | Absent<br>N=672 | Moderate malnutrition<br>N=193 | Severe malnutrition<br>N=27 | P-value |
|--------------------------------|-------------------|-----------------|--------------------------------|-----------------------------|---------|
| Age, years                     | 70.76(5.16)       | 70.62(5.07)     | 71.43(5.61)                    | 72.08(5.75)                 | 0.013   |
| Gender, male                   | 951(63.65%)       | 826(62.58%)     | 54(70.13%)                     | 71(73.20%)                  | 0.053   |
| BMI, kg/m <sup>2</sup>         | 22.58(3.55)       | 22.75(3.52)     | 21.82(3.58)                    | 20.86(3.42)                 | <0.001  |
| Smoking, yes                   | 696(46.59%)       | 609(46.14%)     | 36(46.75%)                     | 51(52.58%)                  | 0.471   |
| Alcohol, yes                   | 289(19.34%)       | 254(19.24%)     | 18(23.38%)                     | 17(17.53%)                  | 0.601   |
| Comorbidities                  |                   |                 |                                |                             |         |
| Absent                         | 1081(72.36%)      | 954(72.27%)     | 60(77.92%)                     | 67(69.07%)                  |         |
| Hypertension                   | 337(22.56%)       | 307(23.26%)     | 10(12.99%)                     | 20(20.62%)                  |         |
| Others                         | 76(5.09%)         | 59(4.47%)       | 7(9.09%)                       | 10(10.31%)                  |         |
| Tumor location                 |                   |                 |                                |                             | 0.104   |
| Lung                           | 458(30.66%)       | 411(31.14%)     | 16(20.78%)                     | 31(31.96%)                  |         |
| Digestive                      | 759(50.80%)       | 657(49.77%)     | 48(62.34%)                     | 54(55.67%)                  |         |
| Other                          | 277(18.54%)       | 252(19.09%)     | 13(16.88%)                     | 12(12.37%)                  |         |
| Tumor stage:                   |                   |                 |                                |                             | 0.054   |
| I                              | 147(9.84%)        | 135(10.23%)     | 6(7.79%)                       | 6(6.19%)                    |         |
| II                             | 336(22.49%)       | 303(22.95%)     | 11(14.29%)                     | 22(22.68%)                  |         |
| III                            | 373(24.97%)       | 338(25.61%)     | 17(22.08%)                     | 18(18.56%)                  |         |
| IV                             | 638(42.70%)       | 544(41.21%)     | 43(55.84%)                     | 51(52.58%)                  |         |
| Chemotherapy, yes              | 939(62.85%)       | 848(64.24%)     | 37(48.05%)                     | 54(55.67%)                  | 0.005   |
| Immunotherapy, yes             | 109(7.30%)        | 96(7.27%)       | 7(9.09%)                       | 6(6.19%)                    | 0.762   |
| Surgery, yes                   | 357(23.90%)       | 306(23.18%)     | 25(32.47%)                     | 26(26.80%)                  | 0.14    |
| ECOG                           | 1.09(0.80)        | 1.05(0.76)      | 1.29(0.87)                     | 1.45(1.04)                  | <0.001  |
| Albumin, g/dl                  | 3.80(0.53)        | 3.93(0.40)      | 3.11(0.22)                     | 2.64(0.36)                  | <0.001  |
| Cholesterol, mg/dl             | 182.95(60.94)     | 186.97(61.03)   | 159.55(55.14)                  | 146.72(46.65)               | <0.001  |
| Lymphocyte, 10 <sup>9</sup> /L | 1.67(1.37)        | 1.75(1.42)      | 1.10(0.44)                     | 1.00(0.48)                  | <0.001  |
| CONUT, as continuous           | 2.30(2.21)        | 1.73(1.51)      | 5.42(1.18)                     | 7.65(1.50)                  | <0.001  |
| Category                       |                   |                 |                                |                             |         |
| Absent                         | 672(44.98%)       | 672(50.91%)     | 0(0.00%)                       | 0(0.00%)                    |         |
| Mild                           | 602(40.29%)       | 579(43.86%)     | 22(28.57%)                     | 1(1.03%)                    |         |
| Moderate                       | 193(12.92%)       | 69(5.23%)       | 55(71.43%)                     | 69(71.13%)                  |         |
| Severe                         | 27(1.81%)         | 0(0.00%)        | 0(0.00%)                       | 27(27.84%)                  |         |
| PNI,as continuous              | 46.05(9.90)       | 48.03(8.14)     | 36.64(0.84)                    | 26.63(10.35)                | <0.001  |
| Category                       |                   |                 |                                |                             |         |
| Absent                         | 1320(88.35%)      | 1320(100.00%)   | 0(0.00%)                       | 0(0.00%)                    |         |
| Moderate                       | 77(5.15%)         | 0(0.00%)        | 77(100.00%)                    | 0(0.00%)                    |         |
| Severe                         | 97(6.49%)         | 0(0.00%)        | 0(0.00%)                       | 97(100.00%)                 |         |
| NRI,as continuous              | 96.96(10.32)      | 99.34(6.60)     | 86.72(3.96)                    | 72.67(16.92)                | <0.001  |
| Category                       |                   |                 |                                |                             |         |
| Absent                         | 617(41.30%)       | 617(46.74%)     | 0(0.00%)                       | 0(0.00%)                    |         |
| Mild                           | 174(11.65%)       | 174(13.18%)     | 0(0.00%)                       | 0(0.00%)                    |         |
| Moderate                       | 607(40.63%)       | 517(39.17%)     | 64(83.12%)                     | 26(26.80%)                  |         |
| Severe                         | 96(6.43%)         | 12(0.91%)       | 13(16.88%)                     | 71(73.20%)                  |         |
| PG-SGA, as continuous          | 6.26(4.48)        | 5.94(4.24)      | 8.16(5.13)                     | 9.15(5.54)                  | <0.001  |
| Category                       |                   |                 |                                |                             |         |
| Absent                         | 52(3.48%)         | 49(3.71%)       | 1(1.30%)                       | 2(2.06%)                    |         |
| Mild                           | 503(33.67%)       | 473(35.83%)     | 14(18.18%)                     | 16(16.49%)                  |         |

|              |             |             |             |             |       |
|--------------|-------------|-------------|-------------|-------------|-------|
| Moderate     | 549(36.75%) | 488(36.97%) | 29(37.66%)  | 32(32.99%)  |       |
| Severe       | 390(26.10%) | 310(23.48%) | 33(42.86%)  | 47(48.45%)  |       |
| HGS, kg      | 22.38(8.93) | 22.65(8.93) | 20.67(8.69) | 20.09(8.79) | 0.005 |
| EORTCQLQ-C30 | 39.21(4.79) | 39.28(4.78) | 39.27(4.67) | 38.33(5.00) | 0.170 |
| PN, yes      | 188(12.58%) | 153(11.59%) | 13(16.88%)  | 22(22.68%)  | 0.003 |
| EN, yes      | 146(9.77%)  | 125(9.47%)  | 5(6.49%)    | 16(16.49%)  | 0.049 |

Values are mean (standard deviation) or n (%).

BMI: body mass index, ECOG: Eastern Cooperative Oncology Group, CONUT: Controlling Nutritional Status score, PNI: prognostic nutritional index, NRI: nutritional risk index, PG-SGA: patient-generated subjective global assessment, HGS: hand grip strength, EORTC QLQ-C30: European Organization for Research and Treatment of Cancer Quality of Life Questionnaire, PN: parenteral nutrition, EN: enteral nutrition.

Supplementary table 5. Kappa agreement for CONUT, PNI, NRI index

|                                  | CONUT vs. PNI    | CONUT vs. NRI    | NRI vs. PNI      |
|----------------------------------|------------------|------------------|------------------|
| Cohen's kappa statistic (95% CI) | 0.20 (0.17-0.22) | 0.36 (0.31-0.41) | 0.17 (0.14-0.20) |
| <i>P</i> -value                  | <0.001           | <0.001           | <0.001           |



Supplementary table 6. Sensitivity, specificity, positive predictive value and negative predictive value for CONUT, PNI, NRI index compared with PG-SGA

| Variables | AUC   | Sensitivity<br>(95% CI) | Specificity<br>(95% CI) | Positive predictive<br>value<br>(95% CI) | Negative predictive<br>value<br>(95% CI) | Cohen's kappa<br>statistic<br>(95% CI) |
|-----------|-------|-------------------------|-------------------------|------------------------------------------|------------------------------------------|----------------------------------------|
| CONUT     | 0.595 | 0.62 (0.59-0.65)        | 0.57 (0.53-0.61)        | 0.71 (0.67-0.74)                         | 0.47 (0.44-0.51)                         | 0.18 (0.13-0.23)*                      |
| PNI       | 0.545 | 0.15 (0.13-0.17)        | 0.94 (0.92-0.96)        | 0.81 (0.75-0.84)                         | 0.40 (0.35-0.49)                         | 0.07 (0.05-0.09)*                      |
| NRI       | 0.617 | 0.67 (0.64-0.70)        | 0.56 (0.52-0.60)        | 0.72 (0.69-0.75)                         | 0.50 (0.47-0.55)                         | 0.23 (0.18-0.28)*                      |

\* $P < 0.001$

Supplementary table 7. Univariable Cox regression analyses of factors predicting all-cause mortality.

| Characteristic       | HR(95%CI)       | P-value |
|----------------------|-----------------|---------|
| Age, per SD          | 1.35(1.17-1.55) | <0.001  |
| Gender               |                 |         |
| Male                 | Ref.            | Ref.    |
| Female               | 0.64(0.54-0.76) | <0.001  |
| BMI                  | 0.93(0.91-0.95) | <0.001  |
| Smoking              |                 |         |
| No                   | Ref.            | Ref.    |
| Yes                  | 1.32(1.13-1.54) | 0.001   |
| Alcohol              |                 |         |
| No                   | Ref.            | Ref.    |
| Yes                  | 1.19(0.98-1.44) | 0.073   |
| Comorbidities        |                 |         |
| Absent               | Ref.            | Ref.    |
| Hypertension         | 1.04(0.86-1.25) | 0.713   |
| Others               | 1.02(0.72-1.45) | 0.896   |
| Tumor location       |                 |         |
| Lung                 | Ref.            | Ref.    |
| Digestive            | 0.80(0.67-0.94) | 0.007   |
| Other                | 0.34(0.25-0.45) | <0.001  |
| Tumor stage:         |                 |         |
| I                    | Ref.            | Ref.    |
| II                   | 1.88(1.11-3.19) | 0.019   |
| III                  | 3.53(2.13-5.85) | <0.001  |
| IV                   | 9.47(5.83-15.4) | <0.001  |
| Chemotherapy         |                 |         |
| No                   | Ref.            | Ref.    |
| Yes                  | 1.48(1.25-1.76) | <0.001  |
| Immunotherapy        |                 |         |
| No                   | Ref.            | Ref.    |
| Yes                  | 1.09(0.82-1.45) | 0.548   |
| Surgery              |                 |         |
| No                   | Ref.            | Ref.    |
| Yes                  | 0.47(0.38-0.58) | <0.001  |
| ECOG                 | 1.50(1.38-1.64) | <0.001  |
| Albumin              | 0.48(0.42-0.55) | <0.001  |
| Cholesterol          | 1.00(1.00-1.00) | 0.247   |
| Lymphocyte           | 0.90(0.80-1.00) | 0.045   |
| CONUT, as continuous | 1.16(1.12-1.19) | <0.001  |
| Category             |                 |         |
| Absent               | Ref.            | Ref.    |
| Mild                 | 1.64(1.37-1.95) | <0.001  |
| Moderate             | 2.48(1.97-3.11) | <0.001  |
| Severe               | 3.48(2.18-5.56) | <0.001  |
| NRI, as continuous   | 0.98(0.97-0.98) | <0.001  |
| Category             |                 |         |
| Absent               | Ref.            | Ref.    |
| Mild                 | 1.34(1.01-1.78) | 0.044   |

|                       |                 |        |
|-----------------------|-----------------|--------|
| Moderate              | 2.23(1.85-2.67) | <0.001 |
| Severe                | 3.70(2.77-4.95) | <0.001 |
| PNI, as continuous    | 0.97(0.96-0.98) | <0.001 |
| Category              |                 |        |
| Absent                | Ref.            | Ref.   |
| Moderate              | 1.91(1.41-2.59) | <0.001 |
| Severe                | 2.58(1.99-3.34) | <0.001 |
| PG-SGA, as continuous | 1.09(1.07-1.11) | <0.001 |
| Category              |                 |        |
| Absent                | Ref.            | Ref.   |
| Mild                  | 1.11(0.65-1.88) | 0.702  |
| Moderate              | 1.54(0.91-2.60) | 0.105  |
| Severe                | 2.79(1.66-4.71) | <0.001 |
| HGS                   | 0.99(0.98-1.00) | 0.006  |
| EORTC QLQ-C30         | 0.93(0.85-1.01) | 0.076  |
| PN                    |                 |        |
| No                    | Ref.            | Ref.   |
| Yes                   | 1.01(0.78-1.29) | 0.967  |
| EN                    |                 |        |
| No                    | Ref.            | Ref.   |
| Yes                   | 0.73(0.54-0.99) | 0.043  |

BMI: body mass index, ECOG: Eastern Cooperative Oncology Group, CONUT: Controlling Nutritional Status score, PNI: prognostic nutritional index, NRI: nutritional risk index, PG-SGA: patient-generated subjective global assessment, HGS: hand grip strength, EORTC QLQ-C30: European Organization for Research and Treatment of Cancer Quality of Life Questionnaire, PN: parenteral nutrition, EN: enteral nutrition.

Supplementary table 8. Multivariate Cox proportional hazards analyses of malnutrition indexes to predict all-cause mortality according to the location of cancer.

|                      | crude HR(95%CI)   | P-value | adjusted HR (95% CI) <sup>a</sup> | P-value | adjusted HR(95%CI) <sup>b</sup> | P-value |
|----------------------|-------------------|---------|-----------------------------------|---------|---------------------------------|---------|
| <b>Lung</b>          |                   |         |                                   |         |                                 |         |
| CONUT, as continuous | 1.15(1.09-1.22)   | <0.001  | 1.12(1.06-1.18)                   | <0.001  | 1.09(1.02-1.15)                 | 0.007   |
| Category             |                   |         |                                   |         |                                 |         |
| Absent               | Ref.              |         | Ref.                              |         | Ref.                            |         |
| Mild                 | 1.66(1.25-2.21)   | <0.001  | 1.53(1.14-2.04)                   | 0.004   | 1.42(1.05-1.92)                 | 0.022   |
| Moderate             | 2.05(1.36-3.07)   | <0.001  | 1.62(1.07-2.47)                   | 0.024   | 1.29(0.83-2.01)                 | 0.251   |
| Severe               | 4.59(2.11-9.97)   | <0.001  | 3.59(1.64-7.86)                   | 0.001   | 2.78(1.22-6.34)                 | 0.015   |
| PNI, as continuous   | 0.98(0.97-0.99)   | <0.001  | 0.98(0.97-1.00)                   | 0.024   | 0.99(0.97-1.00)                 | 0.080   |
| Category             |                   |         |                                   |         |                                 |         |
| Absent               | Ref.              |         | Ref.                              |         | Ref.                            |         |
| Moderate             | 1.58(0.86-2.9)    | 0.138   | 1.34(0.73-2.48)                   | 0.344   | 1.49(0.80-2.79)                 | 0.208   |
| Severe               | 2.36(1.5-3.7)     | <0.001  | 2.13(1.35-3.35)                   | 0.001   | 2.15(1.34-3.47)                 | 0.002   |
| NRI, as continuous   | 0.98(0.97-0.99)   | <0.001  | 0.98(0.98-0.99)                   | 0.001   | 0.99(0.98-1.00)                 | 0.011   |
| Category             |                   |         |                                   |         |                                 |         |
| Absent               | Ref.              |         | Ref.                              |         | Ref.                            |         |
| Mild                 | 1.03(0.63-1.68)   | 0.910   | 0.94(0.58-1.55)                   | 0.818   | 1.05(0.64-1.74)                 | 0.836   |
| Moderate             | 1.92(1.44-2.56)   | <0.001  | 1.57(1.16-2.13)                   | 0.003   | 1.37(1.00-1.86)                 | 0.047   |
| Severe               | 2.57(1.55-4.25)   | <0.001  | 2.15(1.29-3.59)                   | 0.003   | 2.19(1.28-3.73)                 | 0.004   |
| <b>Digestive</b>     |                   |         |                                   |         |                                 |         |
| CONUT, as continuous | 1.11(1.06-1.16)   | <0.001  | 1.1(1.05-1.15)                    | <0.001  | 1.07(1.02-1.12)                 | 0.004   |
| Category             |                   |         |                                   |         |                                 |         |
| Absent               | Ref.              |         | Ref.                              |         | Ref.                            |         |
| Mild                 | 1.35(1.06-1.73)   | 0.015   | 1.33(1.04-1.70)                   | 0.021   | 1.31(1.02-1.69)                 | 0.034   |
| Moderate             | 2.07(1.54-2.79)   | <0.001  | 1.91(1.41-2.59)                   | <0.001  | 1.97(1.42-2.74)                 | <0.001  |
| Severe               | 2.17(1.1-4.28)    | 0.025   | 1.96(0.99-3.88)                   | 0.052   | 1.28(0.61-2.68)                 | 0.510   |
| PNI, as continuous   | 0.97(0.96-0.98)   | <0.001  | 0.97(0.96-0.99)                   | <0.001  | 0.98(0.97-0.99)                 | 0.002   |
| Category             |                   |         |                                   |         |                                 |         |
| Absent               | Ref.              |         | Ref.                              |         | Ref.                            |         |
| Moderate             | 1.75(1.18-2.59)   | 0.006   | 1.62(1.09-2.42)                   | 0.018   | 1.50(0.98-2.28)                 | 0.061   |
| Severe               | 2.27(1.6-3.21)    | <0.001  | 2.06(1.45-2.94)                   | <0.001  | 1.91(1.31-2.79)                 | <0.001  |
| NRI, as continuous   | 0.97(0.96-0.98)   | <0.001  | 0.97(0.97-0.98)                   | <0.001  | 0.98(0.97-0.99)                 | <0.001  |
| Category             |                   |         |                                   |         |                                 |         |
| Absent               | Ref.              |         | Ref.                              |         | Ref.                            |         |
| Mild                 | 1.82(1.25-2.65)   | 0.002   | 1.81(1.24-2.63)                   | 0.002   | 1.77(1.21-2.58)                 | 0.003   |
| Moderate             | 2.09(1.61-2.7)    | <0.001  | 2.01(1.55-2.61)                   | <0.001  | 2.01(1.54-2.62)                 | <0.001  |
| Severe               | 3.68(2.47-5.48)   | <0.001  | 3.34(2.22-5.03)                   | <0.001  | 2.89(1.85-4.52)                 | <0.001  |
| <b>Other</b>         |                   |         |                                   |         |                                 |         |
| CONUT, as continuous | 1.31(1.21-1.42)   | <0.001  | 1.31(1.2-1.43)                    | <0.001  | 1.38(1.23-1.56)                 | <0.001  |
| Category             |                   |         |                                   |         |                                 |         |
| Absent               | Ref.              |         | Ref.                              |         | Ref.                            |         |
| Mild                 | 2.77(1.51-5.08)   | 0.001   | 2.27(1.21-4.26)                   | 0.01    | 1.85(0.92-3.70)                 | 0.082   |
| Moderate             | 7.19(3.36-15.39)  | <0.001  | 5.52(2.53-12.02)                  | <0.001  | 5.35(2.01-14.20)                | <0.001  |
| Severe               | 12.85(3.75-43.98) | <0.001  | 13.34(3.67-48.52)                 | <0.001  | 23.18(5.14-104.58)              | <0.001  |
| PNI, as continuous   | 0.95(0.93-0.97)   | <0.001  | 0.96(0.93-0.98)                   | <0.001  | 0.95(0.93-0.98)                 | 0.002   |
| Category             |                   |         |                                   |         |                                 |         |
| Absent               | Ref.              |         | Ref.                              |         | Ref.                            |         |

|                    |                  |        |                  |        |                  |        |
|--------------------|------------------|--------|------------------|--------|------------------|--------|
| Moderate           | 4.67(2.1-10.38)  | <0.001 | 5.08(2.26-11.42) | <0.001 | 4.3(1.72-10.76)  | 0.002  |
| Severe             | 5.71(2.55-12.79) | <0.001 | 5.00(2.22-11.27) | <0.001 | 5.09(1.93-13.44) | 0.001  |
| NRI, as continuous | 0.97(0.96-0.99)  | <0.001 | 0.97(0.96-0.99)  | 0.001  | 0.98(0.95-1.00)  | 0.023  |
| Category           |                  |        |                  |        |                  |        |
| Absent             | Ref.             |        | Ref.             |        | Ref.             |        |
| Mild               | 0.87(0.32-2.32)  | 0.778  | 0.78(0.29-2.10)  | 0.629  | 0.54(0.20-1.49)  | 0.235  |
| Moderate           | 3.28(1.81-5.94)  | <0.001 | 2.81(1.54-5.12)  | <0.001 | 2.04(1.03-4.03)  | 0.041  |
| Severe             | 8.33(3.61-19.2)  | <0.001 | 6.86(2.94-16.02) | <0.001 | 5.55(2.15-14.31) | <0.001 |

a: Adjusted by age, gender, BMI

b: Adjusted by age, gender, BMI, comorbidities disease, smoking, alcohol, tumor location, tumor stage, chemotherapy, immunotherapy, surgery, parenteral nutrition intervention, enteral nutrition intervention, ECOG, hand grip strength, EORTC QLQ-C30. For NRI, total cholesterol and lymphocyte count were adjusted additionally. For PNI, lymphocyte count was adjusted additionally.

HR: hazard ratio, CI: confidence interval, ECOG: Eastern Cooperative Oncology Group, CONUT: Controlling Nutritional Status score, PNI: prognostic nutritional index, NRI: nutritional risk index, PG-SGA: patient-generated subjective global assessment, HGS: hand grip strength, EORTC QLQ-C30: European Organization for Research and Treatment of Cancer Quality of Life Questionnaire

Supplementary table 9. Multivariate Cox proportional hazards analyses of malnutrition indexes to predict all-cause mortality according to exclude patients died within 6 months.

|                      | crude HR(95%CI) | <i>P</i> -value | adjusted HR (95% CI) <sup>a</sup> | <i>P</i> -value | adjusted HR(95%CI) <sup>b</sup> | <i>P</i> -value |
|----------------------|-----------------|-----------------|-----------------------------------|-----------------|---------------------------------|-----------------|
| CONUT, as continuous | 1.11(1.07-1.16) | <0.001          | 1.09(1.04-1.13)                   | <0.001          | 1.06(1.02-1.11)                 | 0.007           |
| Category             |                 |                 |                                   |                 |                                 |                 |
| Absent               | Ref.            |                 |                                   |                 | Ref.                            |                 |
| Mild                 | 1.49(1.21-1.84) | <0.001          | 1.40(1.14-1.73)                   | 0.001           | 1.29(1.04-1.60)                 | 0.021           |
| Moderate             | 1.88(1.40-2.53) | <0.001          | 1.60(1.18-2.16)                   | 0.002           | 1.47(1.07-2.02)                 | 0.016           |
| Severe               | 2.35(1.20-4.59) | 0.013           | 1.97(1.00-3.86)                   | 0.050           | 1.50(0.73-3.06)                 | 0.270           |
| PNI, as continuous   | 0.97(0.96-0.98) | <0.001          | 0.98(0.97-0.99)                   | <0.001          | 0.98(0.97-1.00)                 | 0.005           |
| Category             |                 |                 |                                   |                 |                                 |                 |
| Absent               | Ref.            |                 |                                   |                 |                                 |                 |
| Moderate             | 1.44(0.95-2.20) | 0.089           | 1.33(0.87-2.03)                   | 0.190           | 1.29(0.84-2.00)                 | 0.244           |
| Severe               | 1.89(1.30-2.74) | <0.001          | 1.63(1.12-2.37)                   | 0.011           | 1.66(1.12-2.45)                 | 0.011           |
| NRI, as continuous   | 0.98(0.97-0.99) | <0.001          | 0.98(0.97-0.99)                   | <0.001          | 0.98(0.98-0.99)                 | <0.001          |
| Category             |                 |                 |                                   |                 |                                 |                 |
| Absent               | Ref.            |                 |                                   |                 |                                 |                 |
| Mild                 | 1.27(0.91-1.77) | 0.155           | 1.22(0.88-1.70)                   | 0.231           | 1.23(0.88-1.71)                 | 0.229           |
| Moderate             | 2.01(1.62-2.49) | <0.001          | 1.82(1.47-2.27)                   | <0.001          | 1.63(1.30-2.03)                 | <0.001          |
| Severe               | 2.62(1.76-3.91) | <0.001          | 2.22(1.48-3.33)                   | <0.001          | 2.10(1.37-3.22)                 | <0.001          |

a: Adjusted by age, gender, BMI

b: Adjusted by age, gender, BMI, comorbidities disease, smoking, alcohol, tumor location, tumor stage, chemotherapy, immunotherapy, surgery, parenteral nutrition intervention, enteral nutrition intervention, ECOG, hand grip strength, EORTC QLQ-C30. For NRI, total cholesterol and lymphocyte count were adjusted additionally. For PNI, lymphocyte count was adjusted additionally.

HR: hazard ratio, CI: confidence interval, ECOG: Eastern Cooperative Oncology Group, CONUT: Controlling Nutritional Status score, PNI: prognostic nutritional index, NRI: nutritional risk index, PG-SGA: patient-generated subjective global assessment, HGS: hand grip strength, EORTC QLQ-C30: European Organization for Research and Treatment of Cancer Quality of Life Questionnaire

Supplementary table 10. Each parameters of EORTC QLQ-C30 stratified by CONUT.

| CONUT                  | Overall<br>N=1494 | Absent<br>N=672  | Mild<br>N=602    | Moderate<br>N=193 | Severe<br>N=27   | P-value |
|------------------------|-------------------|------------------|------------------|-------------------|------------------|---------|
| Physical function      | 86.7 (73.3-100)   | 93.3 (80.0-100)  | 86.7 (73.3-100)  | 80.0 (66.7-93.3)  | 80.0 (53.3-86.7) | <0.001  |
| Role function          | 83.3 (66.7-100)   | 100 (66.7-100)   | 83.3 (66.7-100)  | 66.7 (66.7-100)   | 66.7 (33.3-100)  | <0.001  |
| Emotional function     | 100 (75.0-100)    | 100 (83.3-100)   | 95.8 (75.0-100)  | 100 (75.0-100)    | 91.7 (70.8-95.8) | 0.084   |
| Cognitive function     | 100 (83.3-100)    | 100 (83.3-100)   | 83.3 (83.3-100)  | 83.3 (66.7-100)   | 83.3 (66.7-100)  | <0.001  |
| Social function        | 66.7 (66.7-100)   | 83.3 (66.7-100)  | 66.7 (66.7-100)  | 66.7 (66.7-100)   | 66.7 (58.3-100)  | <0.001  |
| Global QOL             | 66.7 (50.0-75.0)  | 66.7 (50.0-83.3) | 58.3 (50.0-66.7) | 50.0 (50.0-66.7)  | 50.0 (33.3-66.7) | <0.001  |
| Fatigue                | 11.1 (0.00-33.3)  | 11.1 (0.00-22.2) | 22.2 (0.00-33.3) | 22.2 (0.00-33.3)  | 33.3 (11.1-55.6) | <0.001  |
| Nausea and vomiting    | 0.00 (0.00-0.00)  | 0.00 (0.00-0.00) | 0.00 (0.00-0.00) | 0.00 (0.00-0.00)  | 0.00 (0.00-0.00) | <0.001  |
| Pain                   | 0.00 (0.00-16.7)  | 0.00 (0.00-16.7) | 0.00 (0.00-16.7) | 0.00 (0.00-33.3)  | 0.00 (0.00-33.3) | <0.001  |
| Dyspnea                | 0.00 (0.00-33.3)  | 0.00 (0.00-8.33) | 0.00 (0.00-0.00) | 0.00 (0.00-33.3)  | 0.00 (0.00-33.3) | 0.008   |
| Sleep disturbance      | 0.00 (0.00-33.3)  | 0.00 (0.00-33.3) | 0.00 (0.00-33.3) | 33.3 (0.00-33.3)  | 0.00 (0.00-50.0) | 0.004   |
| Appetite loss          | 0.00 (0.00-33.3)  | 0.00 (0.00-0.00) | 0.00 (0.00-33.3) | 0.00 (0.00-33.3)  | 0.00 (0.00-50.0) | <0.001  |
| Constipation           | 0.00 (0.00-0.00)  | 0.00 (0.00-0.00) | 0.00 (0.00-0.00) | 0.00 (0.00-0.00)  | 0.00 (0.00-0.00) | 0.422   |
| Diarrhea               | 0.00 (0.00-0.00)  | 0.00 (0.00-0.00) | 0.00 (0.00-0.00) | 0.00 (0.00-0.00)  | 0.00 (0.00-0.00) | 0.33    |
| Financial difficulties | 33.3 (0.00-33.3)  | 33.3 (0.00-33.3) | 33.3 (0.00-33.3) | 33.3 (0.00-33.3)  | 33.3 (33.3-33.3) | <0.001  |
| overall                | 39.21 (4.79)      | 39.13 (4.88)     | 39.44 (4.57)     | 38.96 (4.99)      | 38.03 (5.72)     | 0.294   |

Data are represented as median (interquartile range) .

Supplementary table 11. Each parameters of EORTC QLQ-C30 stratified by NRI.

| NRI                    | Overall<br>N=1494 | Absent<br>N=617  | Mild<br>N=174    | Moderate<br>N=607 | Severe<br>N=96   | P-value |
|------------------------|-------------------|------------------|------------------|-------------------|------------------|---------|
| Physical function      | 86.7 (73.3-100)   | 93.3 (80.0-100)  | 93.3 (80.0-100)  | 86.7 (73.3-100)   | 80.0 (53.3-86.7) | <0.001  |
| Role function          | 83.3 (66.7-100)   | 100 (66.7-100)   | 100 (66.7-100)   | 66.7 (66.7-100)   | 66.7 (50.0-100)  | <0.001  |
| Emotional function     | 100 (75.0-100)    | 100 (83.3-100)   | 100 (83.3-100)   | 100 (75.0-100)    | 83.3 (66.7-100)  | 0.001   |
| Cognitive function     | 100 (83.3-100)    | 100 (83.3-100)   | 100 (83.3-100)   | 83.3 (66.7-100)   | 83.3 (66.7-100)  | <0.001  |
| Social function        | 66.7 (66.7-100)   | 83.3 (66.7-100)  | 100 (66.7-100)   | 66.7 (66.7-100)   | 66.7 (33.3-100)  | <0.001  |
| Global QOL             | 66.7 (50.0-75.0)  | 66.7 (50.0-83.3) | 66.7 (50.0-75.0) | 58.3 (50.0-66.7)  | 50.0 (33.3-66.7) | <0.001  |
| Fatigue                | 11.1 (0.00-33.3)  | 11.1 (0.00-33.3) | 11.1 (0.00-22.2) | 22.2 (0.00-33.3)  | 33.3 (11.1-44.4) | <0.001  |
| Nausea and vomiting    | 0.00 (0.00-0.00)  | 0.00 (0.00-0.00) | 0.00 (0.00-0.00) | 0.00 (0.00-0.00)  | 0.00 (0.00-0.00) | 0.001   |
| Pain                   | 0.00 (0.00-16.7)  | 0.00 (0.00-16.7) | 0.00 (0.00-16.7) | 0.00 (0.00-16.7)  | 0.00 (0.00-33.3) | 0.003   |
| Dyspnea                | 0.00 (0.00-33.3)  | 0.00 (0.00-0.00) | 0.00 (0.00-25.0) | 0.00 (0.00-33.3)  | 0.00 (0.00-33.3) | 0.017   |
| Sleep disturbance      | 0.00 (0.00-33.3)  | 0.00 (0.00-33.3) | 0.00 (0.00-33.3) | 0.00 (0.00-33.3)  | 33.3 (0.00-33.3) | 0.003   |
| Appetite loss          | 0.00 (0.00-33.3)  | 0.00 (0.00-0.00) | 0.00 (0.00-25.0) | 0.00 (0.00-33.3)  | 0.00 (0.00-33.3) | <0.001  |
| Constipation           | 0.00 (0.00-0.00)  | 0.00 (0.00-0.00) | 0.00 (0.00-0.00) | 0.00 (0.00-0.00)  | 0.00 (0.00-8.33) | 0.736   |
| Diarrhea               | 0.00 (0.00-0.00)  | 0.00 (0.00-0.00) | 0.00 (0.00-0.00) | 0.00 (0.00-0.00)  | 0.00 (0.00-0.00) | 0.546   |
| Financial difficulties | 33.3 (0.00-33.3)  | 33.3 (0.00-33.3) | 33.3 (0.00-33.3) | 33.3 (0.00-33.3)  | 33.3 (33.3-66.7) | <0.001  |
| overall                | 39.21 (4.79)      | 39.34 (4.88)     | 39.28 (4.10)     | 39.10 (4.82)      | 39.01 (5.26)     | 0.796   |

Data are represented as median (interquartile range) .



Supplementary table 12. Each parameters of EORTC QLQ-C30 stratified by PNI .

| PNI                    | Overall<br>N=1494 | Absent<br>N=1320 | Moderate<br>N=77 | Severe<br>N=97   | <i>P</i> -value |
|------------------------|-------------------|------------------|------------------|------------------|-----------------|
| Physical function      | 86.7 (73.3-100)   | 86.7 (80.0-100)  | 73.3 (60.0-86.7) | 80.0 (53.3-86.7) | <0.001          |
| Role function          | 83.3 (66.7-100)   | 100 (66.7-100)   | 66.7 (66.7-100)  | 66.7 (66.7-100)  | <0.001          |
| Emotional function     | 100 (75.0-100)    | 100 (83.3-100)   | 100 (75.0-100)   | 91.7 (66.7-100)  | 0.076           |
| Congnitive function    | 100 (83.3-100)    | 100 (83.3-100)   | 83.3 (66.7-100)  | 83.3 (66.7-100)  | <0.001          |
| Social function        | 66.7 (66.7-100)   | 66.7 (66.7-100)  | 66.7 (66.7-100)  | 66.7 (50.0-100)  | <0.001          |
| Global QOL             | 66.7 (50.0-75.0)  | 66.7 (50.0-75.0) | 50.0 (33.3-66.7) | 50.0 (33.3-66.7) | <0.001          |
| Fatigue                | 11.1 (0.00-33.3)  | 11.1 (0.00-33.3) | 22.2 (11.1-33.3) | 33.3 (0.00-44.4) | <0.001          |
| Nausea and vomiting    | 0.00 (0.00-0.00)  | 0.00 (0.00-0.00) | 0.00 (0.00-0.00) | 0.00 (0.00-0.00) | 0.018           |
| Pain                   | 0.00 (0.00-16.7)  | 0.00 (0.00-16.7) | 0.00 (0.00-33.3) | 0.00 (0.00-33.3) | 0.032           |
| Dyspnea                | 0.00 (0.00-33.3)  | 0.00 (0.00-33.3) | 0.00 (0.00-33.3) | 0.00 (0.00-33.3) | 0.07            |
| Sleep disturbance      | 0.00 (0.00-33.3)  | 0.00 (0.00-33.3) | 33.3 (0.00-33.3) | 33.3 (0.00-33.3) | <0.001          |
| Appetite loss          | 0.00 (0.00-33.3)  | 0.00 (0.00-33.3) | 0.00 (0.00-33.3) | 0.00 (0.00-33.3) | <0.001          |
| Constipation           | 0.00 (0.00-0.00)  | 0.00 (0.00-0.00) | 0.00 (0.00-0.00) | 0.00 (0.00-0.00) | 0.473           |
| Diarrhea               | 0.00 (0.00-0.00)  | 0.00 (0.00-0.00) | 0.00 (0.00-0.00) | 0.00 (0.00-0.00) | 0.787           |
| Financial difficulties | 33.3 (0.00-33.3)  | 33.3 (0.00-33.3) | 33.3 (0.00-33.3) | 33.3 (0.00-33.3) | 0.009           |
| overall                | 39.21 (4.79)      | 39.28 (4.78)     | 39.27 (4.67)     | 38.33 (5.00)     | 0.17            |

Data are represented as median (interquartile range) .

Supplementary table 13. Each parameters of EORTC QLQ-C30(with ECOG less than 2) stratified by CONUT

| CONUT                  | Overall<br>N=1299 | Absent<br>N=627  | Mild<br>N=511    | Moderate<br>N=144 | Severe<br>N=17   | P-value |
|------------------------|-------------------|------------------|------------------|-------------------|------------------|---------|
| Physical function      | 86.7 (80.0-100)   | 93.3 (80.0-100)  | 86.7 (80.0-100)  | 86.7 (73.3-100)   | 80.0 (73.3-93.3) | <0.001  |
| Role function          | 100 (66.7-100)    | 100 (66.7-100)   | 100 (66.7-100)   | 66.7 (66.7-100)   | 100 (66.7-100)   | <0.001  |
| Emotional function     | 100 (83.3-100)    | 100 (83.3-100)   | 100 (83.3-100)   | 100 (83.3-100)    | 91.7 (83.3-100)  | 0.717   |
| Cognitive function     | 100 (83.3-100)    | 100 (83.3-100)   | 100 (83.3-100)   | 83.3 (66.7-100)   | 83.3 (83.3-100)  | 0.029   |
| Social function        | 83.3 (66.7-100)   | 83.3 (66.7-100)  | 66.7 (66.7-100)  | 66.7 (66.7-100)   | 100 (66.7-100)   | 0.007   |
| Global QOL             | 66.7 (50.0-75.0)  | 66.7 (50.0-83.3) | 66.7 (50.0-75.0) | 50.0 (50.0-66.7)  | 50.0 (33.3-66.7) | <0.001  |
| Fatigue                | 11.1 (0.00-33.3)  | 11.1 (0.00-22.2) | 11.1 (0.00-33.3) | 22.2 (0.00-33.3)  | 22.2 (11.1-44.4) | <0.001  |
| Nausea and vomiting    | 0.00 (0.00-0.00)  | 0.00 (0.00-0.00) | 0.00 (0.00-0.00) | 0.00 (0.00-0.00)  | 0.00 (0.00-0.00) | 0.205   |
| Pain                   | 0.00 (0.00-16.7)  | 0.00 (0.00-16.7) | 0.00 (0.00-16.7) | 0.00 (0.00-16.7)  | 0.00 (0.00-33.3) | 0.002   |
| Dyspnea                | 0.00 (0.00-0.00)  | 0.00 (0.00-0.00) | 0.00 (0.00-0.00) | 0.00 (0.00-0.00)  | 0.00 (0.00-33.3) | 0.373   |
| Sleep disturbance      | 0.00 (0.00-33.3)  | 0.00 (0.00-33.3) | 0.00 (0.00-33.3) | 0.00 (0.00-33.3)  | 0.00 (0.00-33.3) | 0.131   |
| Appetite loss          | 0.00 (0.00-33.3)  | 0.00 (0.00-0.00) | 0.00 (0.00-33.3) | 0.00 (0.00-33.3)  | 0.00 (0.00-33.3) | <0.001  |
| Constipation           | 0.00 (0.00-0.00)  | 0.00 (0.00-0.00) | 0.00 (0.00-0.00) | 0.00 (0.00-0.00)  | 0.00 (0.00-0.00) | 0.84    |
| Diarrhea               | 0.00 (0.00-0.00)  | 0.00 (0.00-0.00) | 0.00 (0.00-0.00) | 0.00 (0.00-0.00)  | 0.00 (0.00-0.00) | 0.32    |
| Financial difficulties | 33.3 (0.00-33.3)  | 33.3 (0.00-33.3) | 33.3 (0.00-33.3) | 33.3 (0.00-33.3)  | 33.3 (33.3-33.3) | 0.026   |

Data are represented as median (interquartile range) .

Supplementary table 14. Each parameters of EORTC QLQ-C30(with ECOG less than 2) stratified by NRI

| NRI                    | Overall<br>N=1299 | Absent<br>N=563  | Mild<br>N=161    | Moderate<br>N=507 | Severe<br>N=68   | P-value |
|------------------------|-------------------|------------------|------------------|-------------------|------------------|---------|
| Physical function      | 86.7 (80.0-100)   | 93.3 (86.7-100)  | 93.3 (86.7-100)  | 86.7 (80.0-100)   | 86.7 (73.3-93.3) | <0.001  |
| Role function          | 100 (66.7-100)    | 100 (66.7-100)   | 100 (66.7-100)   | 83.3 (66.7-100)   | 66.7 (66.7-100)  | <0.001  |
| Emotional function     | 100 (83.3-100)    | 100 (83.3-100)   | 100 (83.3-100)   | 100 (83.3-100)    | 91.7 (72.9-100)  | 0.053   |
| Cognitive function     | 100 (83.3-100)    | 100 (83.3-100)   | 100 (83.3-100)   | 83.3 (83.3-100)   | 83.3 (66.7-100)  | 0.001   |
| Social function        | 83.3 (66.7-100)   | 83.3 (66.7-100)  | 100 (66.7-100)   | 66.7 (66.7-100)   | 66.7 (66.7-100)  | <0.001  |
| Global QOL             | 66.7 (50.0-75.0)  | 66.7 (50.0-83.3) | 66.7 (50.0-75.0) | 66.7 (50.0-66.7)  | 58.3 (50.0-66.7) | <0.001  |
| Fatigue                | 11.1 (0.00-33.3)  | 11.1 (0.00-22.2) | 0.00 (0.00-22.2) | 22.2 (0.00-33.3)  | 22.2 (0.00-33.3) | <0.001  |
| Nausea and vomiting    | 0.00 (0.00-0.00)  | 0.00 (0.00-0.00) | 0.00 (0.00-0.00) | 0.00 (0.00-0.00)  | 0.00 (0.00-0.00) | 0.051   |
| Pain                   | 0.00 (0.00-16.7)  | 0.00 (0.00-16.7) | 0.00 (0.00-16.7) | 0.00 (0.00-16.7)  | 0.00 (0.00-33.3) | 0.041   |
| Dyspnea                | 0.00 (0.00-0.00)  | 0.00 (0.00-0.00) | 0.00 (0.00-0.00) | 0.00 (0.00-0.00)  | 0.00 (0.00-33.3) | 0.813   |
| Sleep disturbance      | 0.00 (0.00-33.3)  | 0.00 (0.00-33.3) | 0.00 (0.00-33.3) | 0.00 (0.00-33.3)  | 0.00 (0.00-33.3) | 0.103   |
| Appetite loss          | 0.00 (0.00-33.3)  | 0.00 (0.00-0.00) | 0.00 (0.00-0.00) | 0.00 (0.00-33.3)  | 0.00 (0.00-33.3) | <0.001  |
| Constipation           | 0.00 (0.00-0.00)  | 0.00 (0.00-0.00) | 0.00 (0.00-0.00) | 0.00 (0.00-0.00)  | 0.00 (0.00-0.00) | 0.97    |
| Diarrhea               | 0.00 (0.00-0.00)  | 0.00 (0.00-0.00) | 0.00 (0.00-0.00) | 0.00 (0.00-0.00)  | 0.00 (0.00-0.00) | 0.316   |
| Financial difficulties | 33.3 (0.00-33.3)  | 33.3 (0.00-33.3) | 33.3 (0.00-33.3) | 33.3 (0.00-33.3)  | 33.3 (0.00-66.7) | 0.001   |

Data are represented as median (interquartile range) .

Supplementary table 15. Each parameters of EORTC QLQ-C30(with ECOG less than 2) stratified by PNI

| PNI                    | Overall<br>N=1299 | Absent<br>N=1172 | Moderate<br>N=59 | Severe<br>N=68   | <i>P</i> -value |
|------------------------|-------------------|------------------|------------------|------------------|-----------------|
| Physical function      | 86.7 (80.0-100)   | 93.3 (80.0-100)  | 86.7 (73.3-93.3) | 86.7 (73.3-95.0) | <0.001          |
| Role function          | 100 (66.7-100)    | 100 (66.7-100)   | 66.7 (66.7-100)  | 66.7 (66.7-100)  | <0.001          |
| Emotional function     | 100 (83.3-100)    | 100 (83.3-100)   | 100 (83.3-100)   | 95.8 (83.3-100)  | 0.643           |
| Congnitive function    | 100 (83.3-100)    | 100 (83.3-100)   | 100 (83.3-100)   | 83.3 (66.7-100)  | 0.019           |
| Social function        | 83.3 (66.7-100)   | 83.3 (66.7-100)  | 66.7 (66.7-100)  | 66.7 (66.7-100)  | 0.09            |
| Global QOL             | 66.7 (50.0-75.0)  | 66.7 (50.0-75.0) | 50.0 (50.0-66.7) | 58.3 (50.0-66.7) | <0.001          |
| Fatigue                | 11.1 (0.00-33.3)  | 11.1 (0.00-33.3) | 22.2 (5.56-33.3) | 22.2 (0.00-33.3) | 0.001           |
| Nausea and vomiting    | 0.00 (0.00-0.00)  | 0.00 (0.00-0.00) | 0.00 (0.00-0.00) | 0.00 (0.00-0.00) | 0.706           |
| Pain                   | 0.00 (0.00-16.7)  | 0.00 (0.00-16.7) | 0.00 (0.00-16.7) | 0.00 (0.00-16.7) | 0.398           |
| Dyspnea                | 0.00 (0.00-0.00)  | 0.00 (0.00-0.00) | 0.00 (0.00-0.00) | 0.00 (0.00-0.00) | 0.784           |
| Sleep disturbance      | 0.00 (0.00-33.3)  | 0.00 (0.00-33.3) | 0.00 (0.00-33.3) | 0.00 (0.00-33.3) | 0.056           |
| Appetite loss          | 0.00 (0.00-33.3)  | 0.00 (0.00-0.00) | 0.00 (0.00-33.3) | 0.00 (0.00-33.3) | 0.007           |
| Constipation           | 0.00 (0.00-0.00)  | 0.00 (0.00-0.00) | 0.00 (0.00-0.00) | 0.00 (0.00-0.00) | 0.208           |
| Diarrhea               | 0.00 (0.00-0.00)  | 0.00 (0.00-0.00) | 0.00 (0.00-0.00) | 0.00 (0.00-0.00) | 0.842           |
| Financial difficulties | 33.3 (0.00-33.3)  | 33.3 (0.00-33.3) | 33.3 (0.00-33.3) | 33.3 (0.00-41.7) | 0.099           |

Data are represented as median (interquartile range) .

Supplementary table 16. Hazard risk for all cause mortality in elder patients treated with immunotherapy.

|              | crude HR(95%CI)   | P-value | adjusted HR (95% CI) <sup>a</sup> | P-value | adjusted HR(95%CI) <sup>b</sup> | P-value |
|--------------|-------------------|---------|-----------------------------------|---------|---------------------------------|---------|
| <b>NRI</b>   |                   |         |                                   |         |                                 |         |
| Absent       | Ref               |         |                                   |         |                                 |         |
| Mild         | 2.13(0.82-5.56)   | 0.121   | 1.9(0.73-4.97)                    | 0.189   | 1.95(0.56-6.71)                 | 0.291   |
| Moderate     | 3.75(1.97-7.16)   | <0.001  | 3.77(1.96-7.23)                   | <0.001  | 2.14(1.00-4.59)                 | 0.051   |
| Severe       | 10.56(3.43-32.49) | <0.001  | 10.22(3.18-32.85)                 | <0.001  | 5.83(1.34-25.36)                | 0.019   |
| <b>PNI</b>   |                   |         |                                   |         |                                 |         |
| Absent       | Ref               |         |                                   |         |                                 |         |
| Moderate     | 4.92(2.06-11.75)  | <0.001  | 5.42(2.22-13.24)                  | <0.001  | 2.41(0.73-7.16)                 | 0.124   |
| Severe       | 5.56(2.33-13.27)  | <0.001  | 4.93(2.01-12.06)                  | <0.001  | 3.87(1.21-10.27)                | 0.004   |
| <b>CONUT</b> |                   |         |                                   |         |                                 |         |
| Absent       | Ref               |         |                                   |         |                                 |         |
| Mild         | 2.02(1.06-3.83)   | 0.032   | 1.87(0.97-3.61)                   | 0.060   | 1.57(0.72-3.40)                 | 0.256   |
| Moderate     | 7.12(3.28-15.46)  | <0.001  | 5.97(2.62-13.61)                  | <0.001  | 2.85(0.92-8.83)                 | 0.069   |
| Severe       | NA(NA-NA)         | (NA)    | NA(NA-NA)                         | (NA)    | NA(NA-NA)                       | (NA)    |

a: Adjusted by age, gender, BMI

b: Adjusted by age, gender, BMI, comorbidities disease, smoking, alcohol, tumor location, tumor stage, chemotherapy, immunotherapy, surgery, parenteral nutrition intervention, enteral nutrition intervention, ECOG, hand grip strength, EORTC QLQ-C30. For NRI, total cholesterol and lymphocyte count were adjusted additionally. For PNI, lymphocyte count was adjusted additionally.

HR: hazard ratio, CI: confidence interval, CONUT: Controlling Nutritional Status score, PNI: prognostic nutritional index, NRI: nutritional risk index

Supplementary Figure 1.

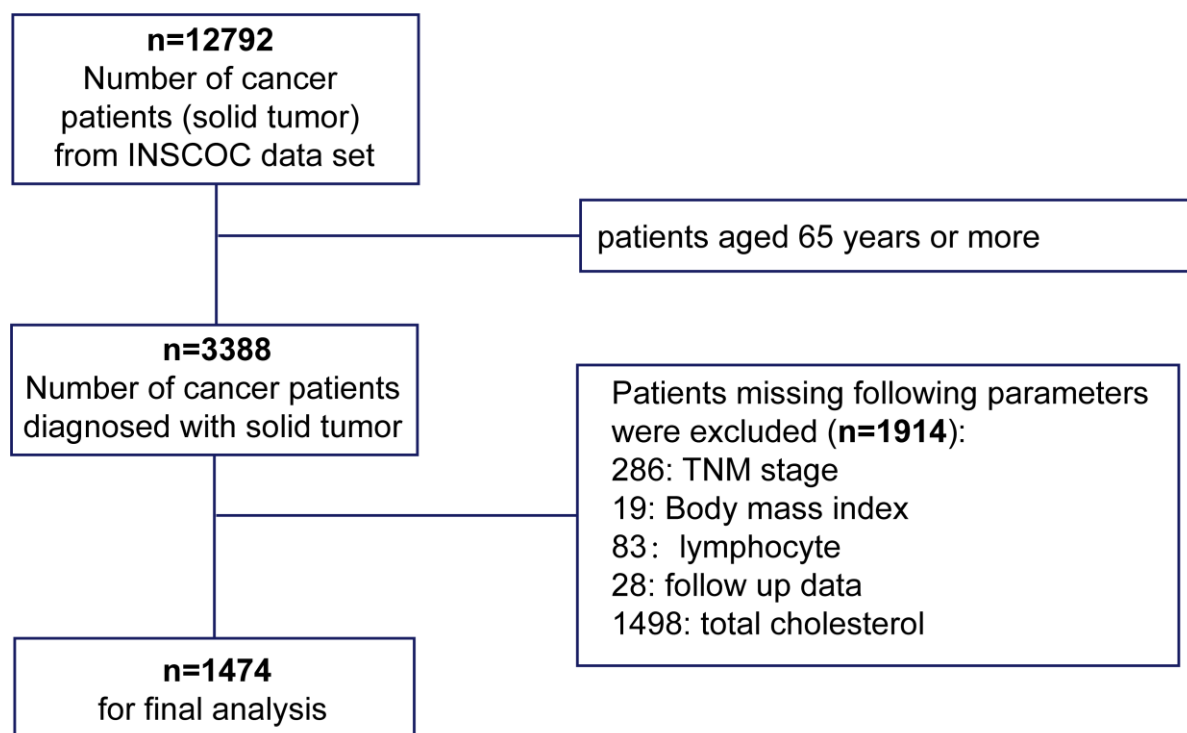

## Supplementary Figure 2.

supplementary Figure 2

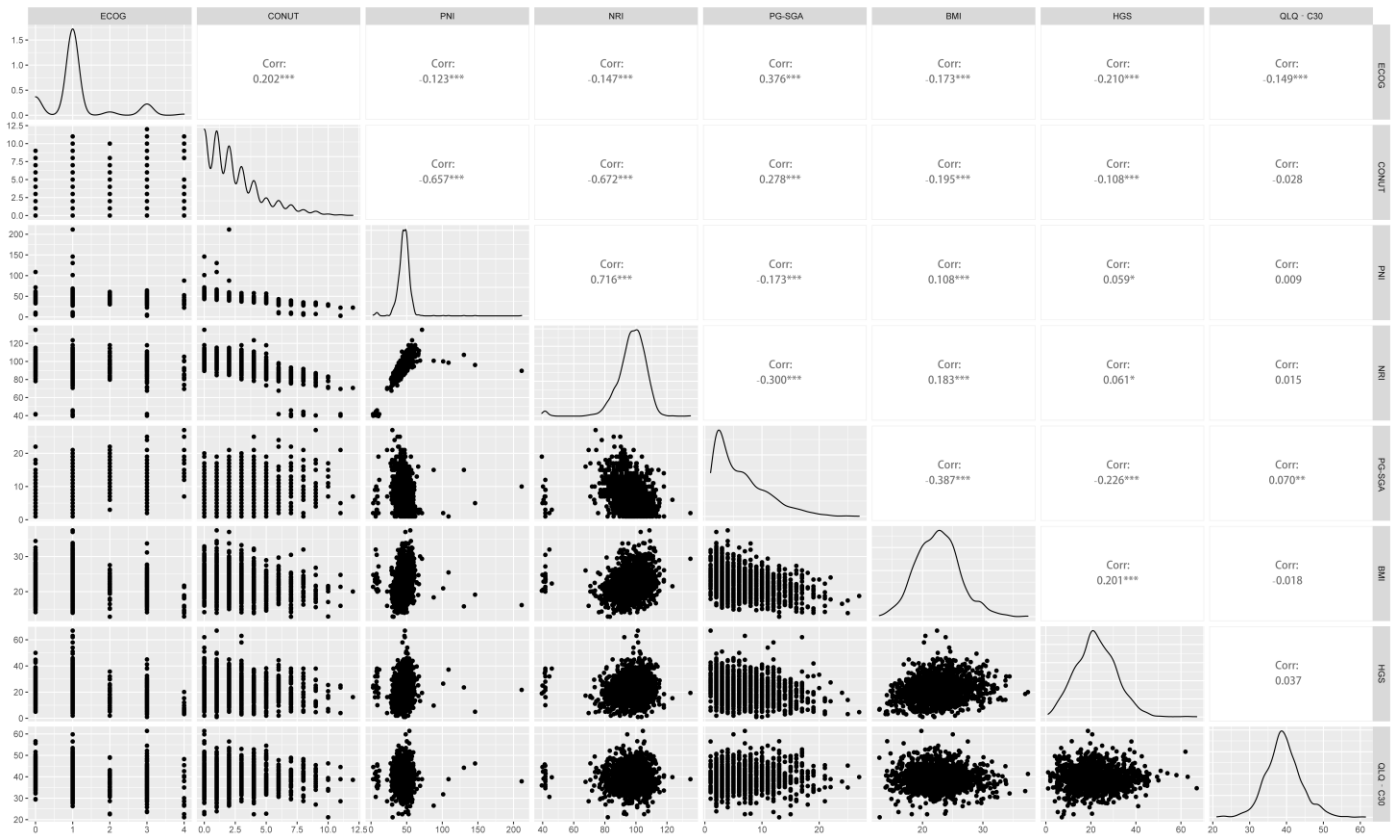

Correlation analysis of clinical parameters.

supplementary Figure 3

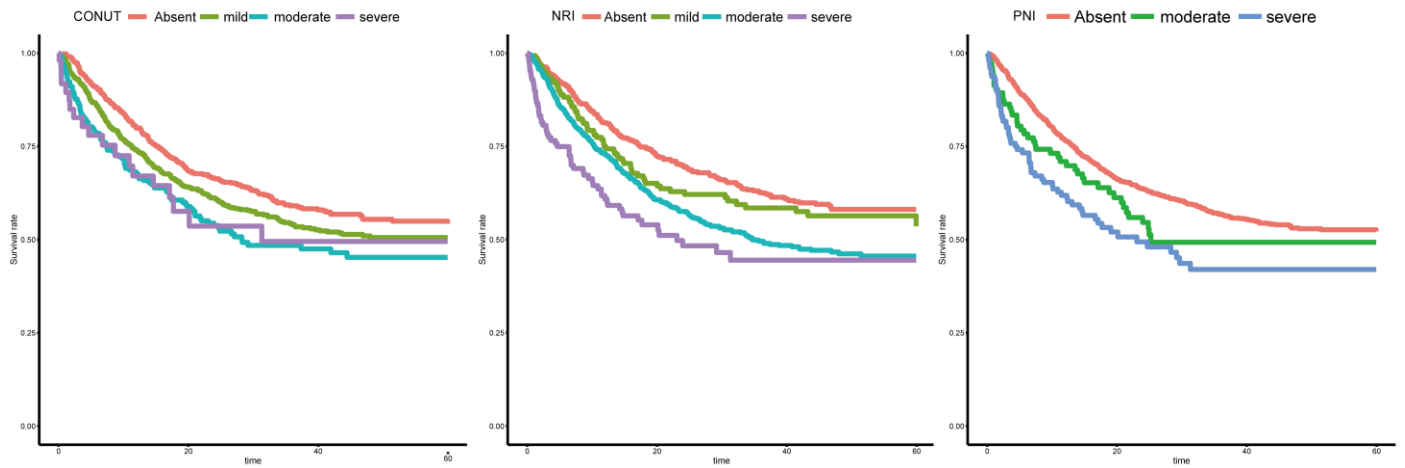

Adjusted Kaplan-Meier curves for all-cause mortality by the category of each malnutrition index in elderly patients with cancer. CONUT: Controlling Nutritional Status score, PNI: prognostic nutritional index, NRI: nutritional risk index. The value was adjusted for age, gender, body mass index, hypertension, other comorbidities disease, smoking, alcohol, tumor location, tumor stage, chemotherapy, immunotherapy, surgery, parenteral nutrition intervention, enteral nutrition intervention, ECOG, PG-SGA, hand grip strength, EORTC QLQ-C30. For NRI, total cholesterol and lymphocyte count were adjusted additionally. For PNI, lymphocyte count was adjusted additionally.



Supplementary Figure 4.

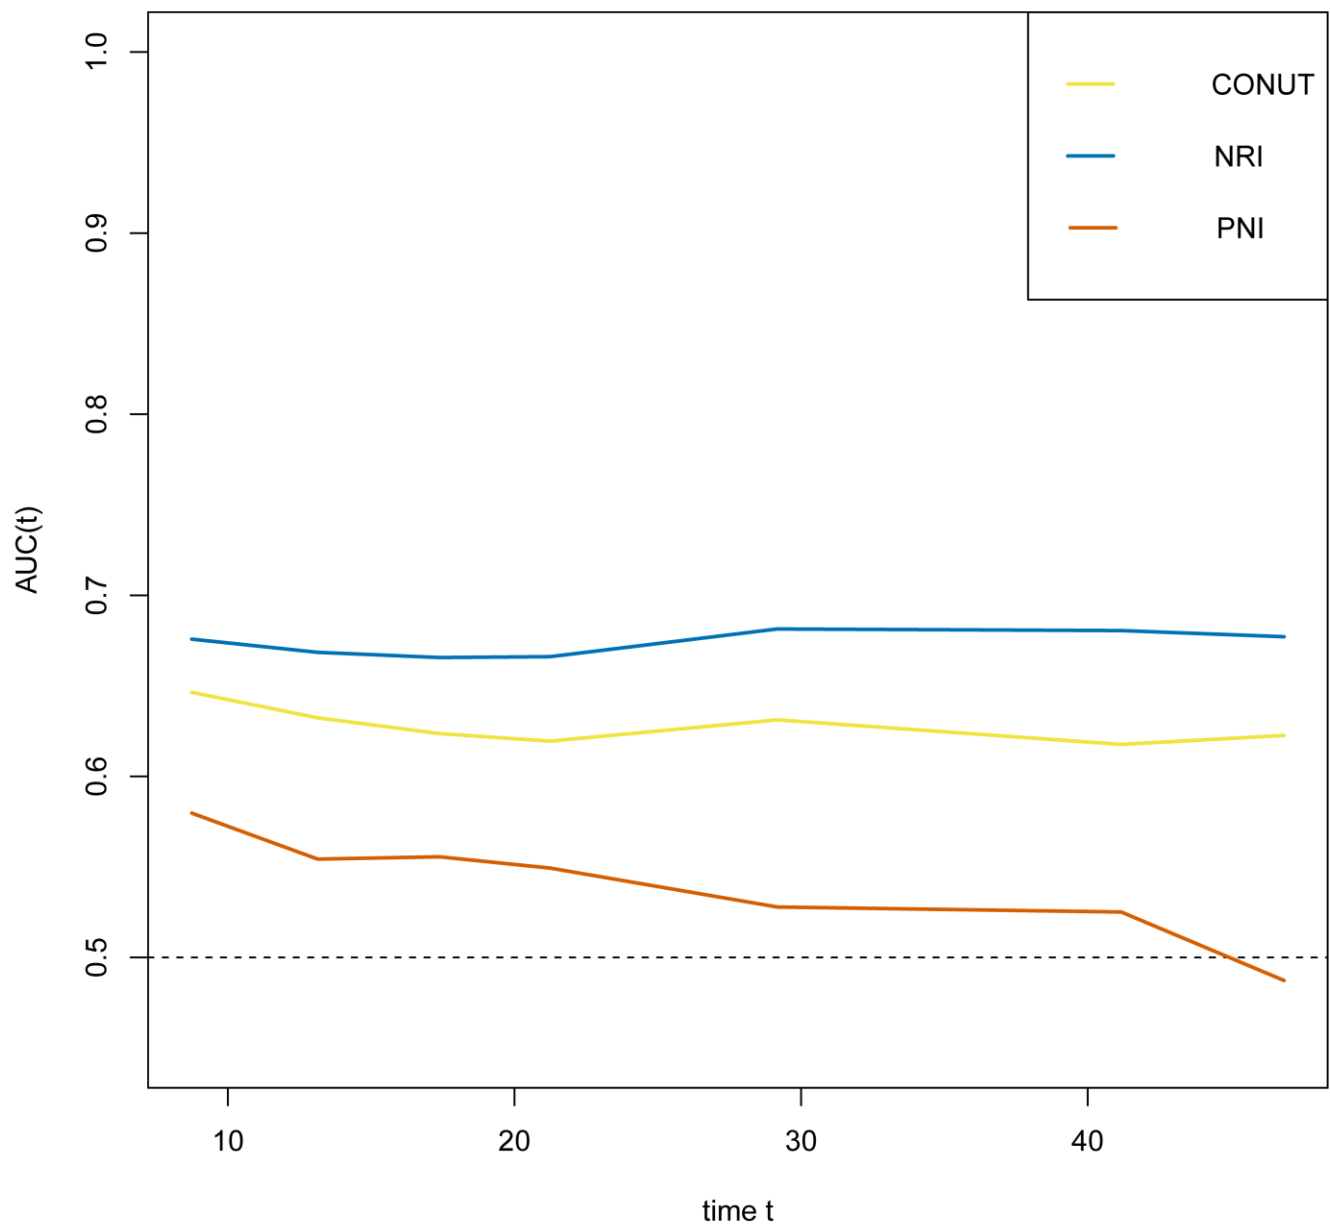

Supplementary Figure 5

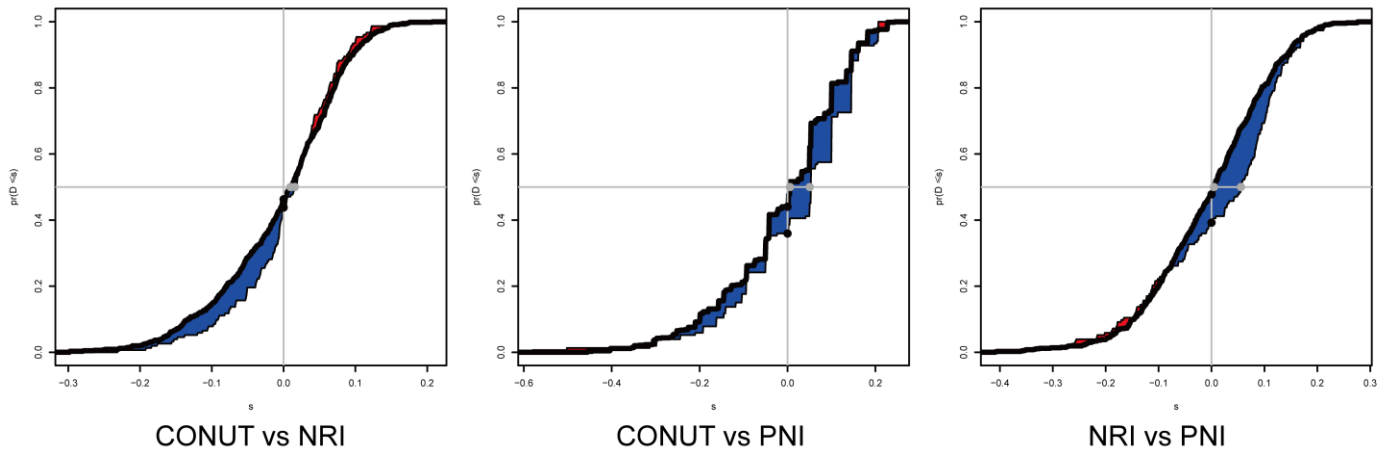

Plot to graphically display Integrated Discrimination Improvement (IDI), continuous Net Reclassification Improvement (NRI) and median improvement, for the additional value of malnutrition scores to TNM stage as assessed by the paired difference of risk scores.

Supplementary Figure 6.

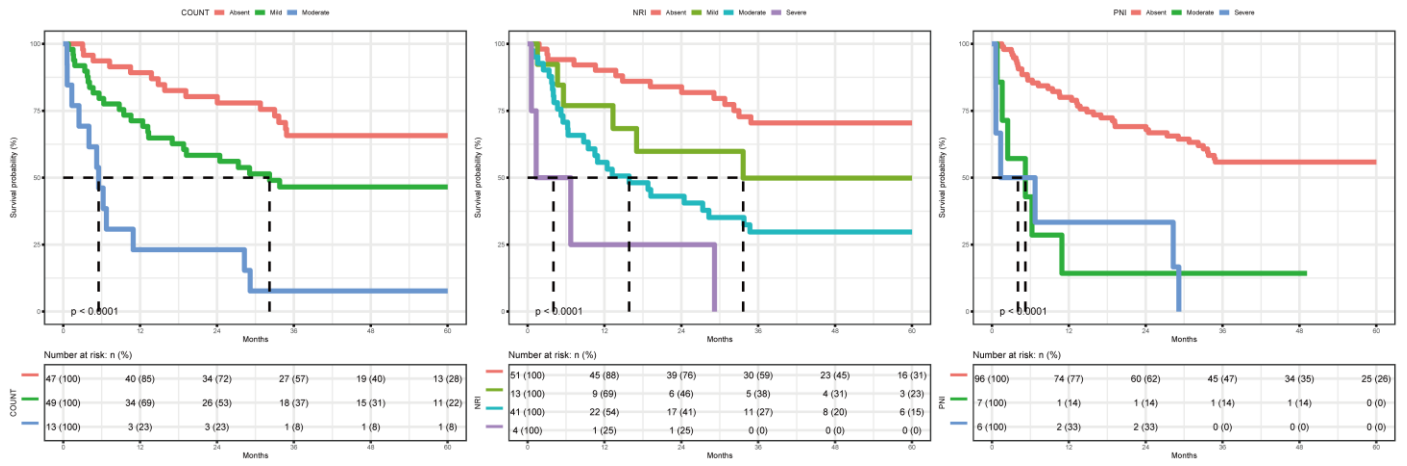

Supplement: Data_Sheet_1.pdf [file Data_Sheet_1.pdf]
